# Supplementary material for: Slow magnetic relaxation in tris(diphosphanylamido) and tetra(phosphanoamido) dysprosium complexes
Source: Royal Society of Chemistry journal article supplement (doi:10.1039/c3dt51078f), 2013-01-01
Supplement: c3dt51078f.pdf [file c3dt51078f.pdf]

## Supporting Information

for

5

### **Slow Magnetic Relaxation in Tris(diphosphanylamido) and Tetra(phosphanoamido) Dysprosium Complexes**

**Franziska Völcker,<sup>a</sup> Yanhua Lan,<sup>\*a</sup> Annie K. Powell,<sup>\*a,b</sup> and Peter W. Roesky<sup>\*a</sup>**

10

<sup>a</sup>Institut für Anorganische Chemie, Karlsruher Institut für Technologie (KIT), Engesserstr. 15, 76137  
Karlsruhe, Germany;

<sup>b</sup>Institut für Nanotechnologie, Karlsruher Institut für Technologie (KIT), Postfach 3640, D-76021  
Karlsruhe, Germany.

15

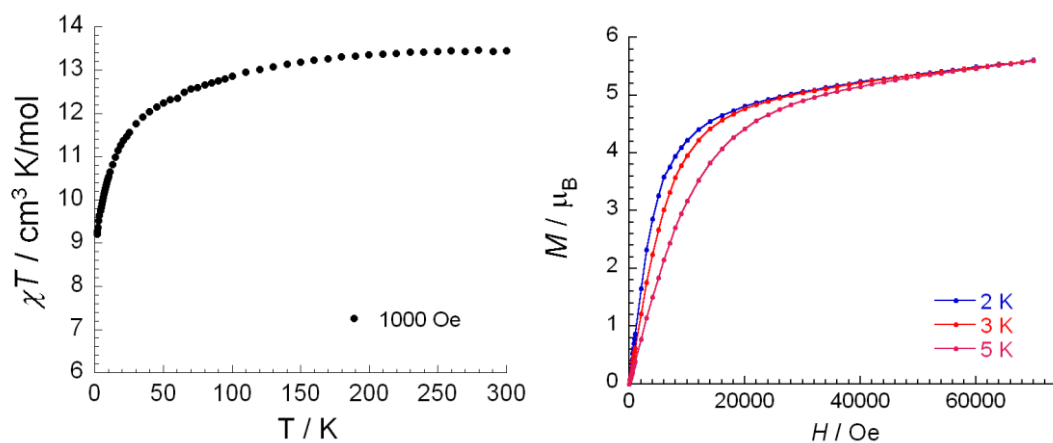

**Figure S1.** (Left) Temperature dependence of dc magnetic susceptibility of complex **1**. (Right) Field dependence of magnetization of complex **1**.

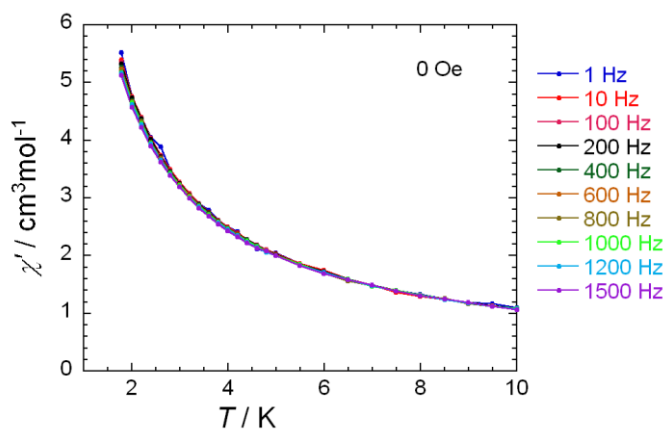

**Figure S2.** Temperature dependence of in-phase ac magnetic susceptibility of complex **1** at different frequencies.

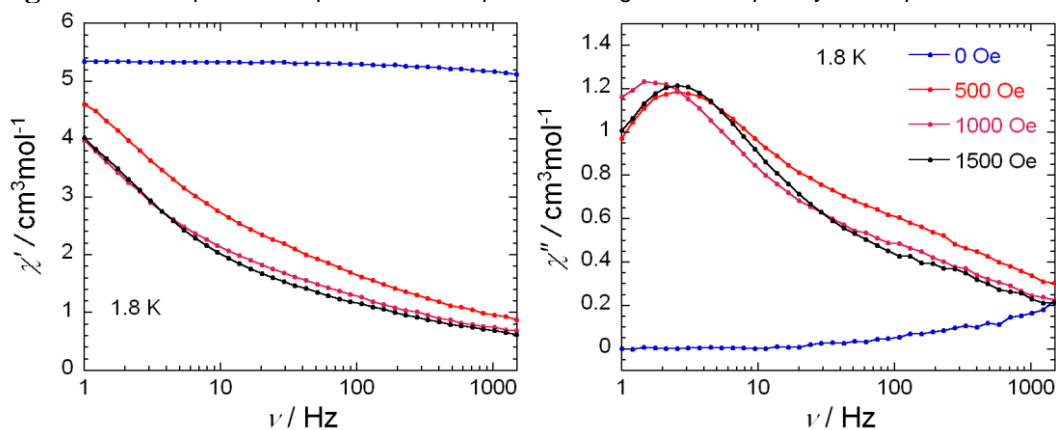

**Figure S3.** Frequency dependence of ac magnetic susceptibility of complex **1** under different external dc fields.

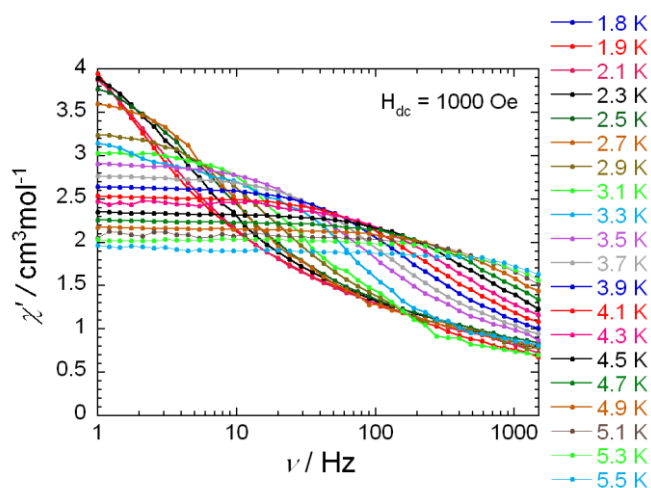

**Figure S4.** Frequency dependence of in-phase ac magnetic susceptibility of complex **1** at indicated temperatures under a dc field of 1000 Oe.

5

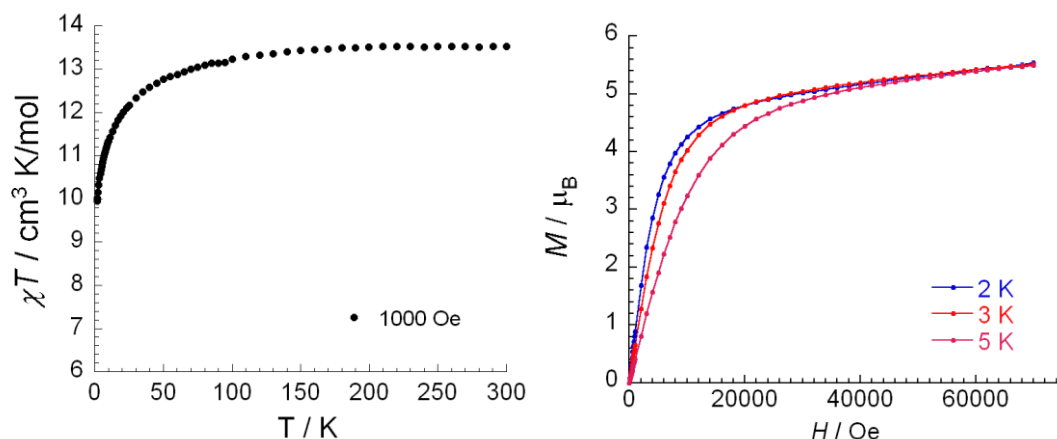

**Figure S5.** (Left) Temperature dependence of dc magnetic susceptibility of complex **1**. (Right) Field dependence of magnetization of complex **2**.

10

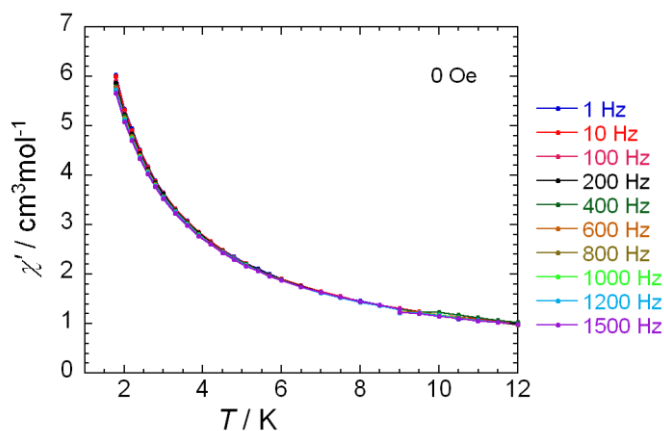

**Figure S6.** Temperature dependence of in-phase ac magnetic susceptibility of complex **2** at different frequencies.

15

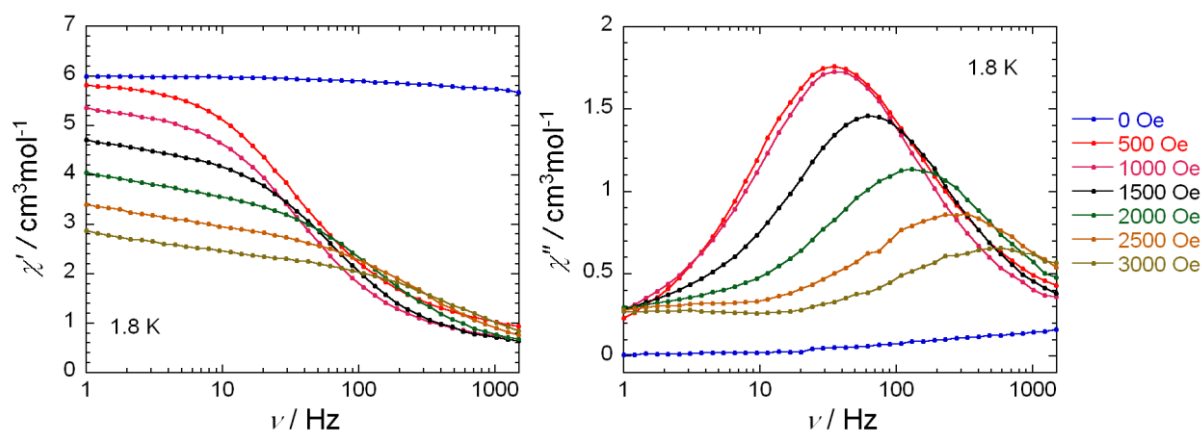

**Figure S7.** Frequency dependence of ac magnetic susceptibility of complex **2** under different external dc fields.

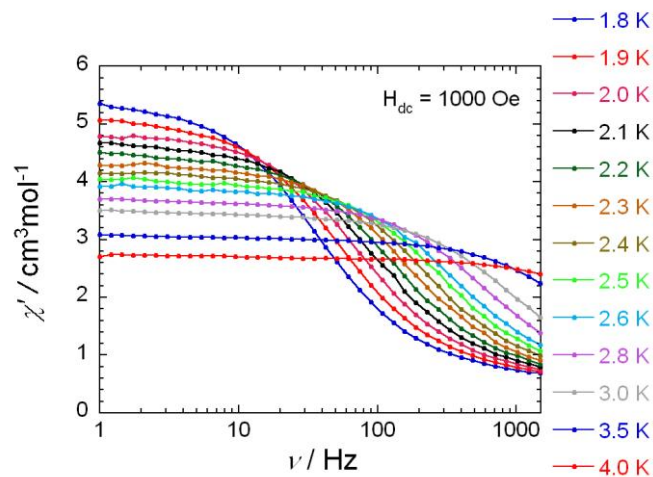

**Figure S8.** Frequency dependence of in-phase ac magnetic susceptibility of complex **2** at indicated temperatures under a dc field of 1000 Oe.
